# Supplementary material
Source: PubMed Central journal article supplement (PMC4401576)
Supplement: NIHMS655341-supplement-Sup_Tab_3.pdf [file NIHMS655341-supplement-Sup_Tab_3.pdf]

| Virus                                                  | Clade | Tier | IC <sub>50</sub> (nM) |                 |                        |                           |         |         |            |            |
|--------------------------------------------------------|-------|------|-----------------------|-----------------|------------------------|---------------------------|---------|---------|------------|------------|
|                                                        |       |      | dsDNA                 | PG9-60bp-3BNC60 | PG9-3BNC60 heterodimer | Mix of PG9, 3BNC60, dsDNA | PG9 Fab | PG9 IgG | 3BNC60 Fab | 3BNC60 IgG |
| 6535.3                                                 | B     | 1B   | >1000                 | <0.03 (>767x)   |                        | 23                        | 18      | 4.0     | 27         | 4.0        |
| SC422661.8                                             | B     | 2    | >1000                 | <0.03 (>47x)    |                        | 1.4                       | 14      | 6.9     | 1.0        | 0.3        |
| PVO.4                                                  | B     | 3    | >1000                 | <0.03 (>40x)    | 40                     | 1.2                       | 59      | 57      | 1.3        | 0.1        |
| TRO.11                                                 | B     | 2    | >1000                 | <0.03 (>40x)    | 2.6                    | 1.2                       | 54      | 71      | 1.3        | 0.2        |
| TRJO4551.58                                            | B     | 3    | >1000                 | <0.03 (>187x)   |                        | 5.6                       | 32      | 7.6     | 4.8        | <0.1       |
| CAAN5342.A2                                            | B     | 2    | >1000                 | 0.07 (229x)     | >10                    | 16                        | 25      | 26      | 6.2        | 3.6        |
| THRO4156.18                                            | B     | 2    | >1000                 | 0.21 (152x)     | >10                    | 32                        | <0.1    | 110     | 23         | 3.5        |
| RHPA4259.7                                             | B     | 2    | >1000                 | <0.03 (>20x)    |                        | 0.6                       | 0.2     | <0.1    | 1.5        | 0.3        |
| Du156.12                                               | C     | 2    | >1000                 | <0.03 (>53x)    |                        | 1.6                       | 0.6     | 0.3     | 9.4        | 0.3        |
| Du172.17                                               | C     | 2    | >1000                 | <0.03 (>273x)   |                        | 8.2                       | 2.2     | 3.1     | 210        | 16         |
| Du422.1                                                | C     | 2    | >1000                 | <0.03 (>160x)   | 9.3                    | 4.8                       | 0.6     | 1.8     | >200       | >330       |
| ZM197M.PB7                                             | C     | 1B   | >1000                 | 0.07 (143x)     |                        | 10                        | 5.4     | 5.1     | 15         | 3.8        |
| ZM214M.PL15                                            | C     | 1B   | >1000                 | 0.21 (39x)      | 16                     | 8.2                       | >200    | >330    | 6.9        | 1.7        |
| ZM233M.PB6                                             | C     | 2    | >1000                 | <0.03 (>3x)     |                        | <0.1                      | <0.1    | <0.1    | 14         | 1.4        |
| ZM249M.PL1                                             | C     | 2    | >1000                 | <0.03 (>27x)    |                        | 0.8                       | 0.2     | 0.3     | 2.7        | 0.3        |
| ZM53M.PB12                                             | C     | 2    | >1000                 | <0.03 (>33x)    | 0.63                   | 1.0                       | 0.4     | 0.5     | 5.2        | 1.3        |
| ZM109F.PB4                                             | C     | 1B   | >1000                 | <0.03 (>280x)   |                        | 8.4                       | 6.8     | 2.1     | 39         | 0.3        |
| ZM135M.PL10a                                           | C     | 2    | >1000                 | <0.03 (>140x)   |                        | 4.2                       | 160     | >330    | 3.7        | 0.4        |
| CAP45.2.00.G3                                          | C     | 2    | >1000                 | <0.03 (>3x)     |                        | <0.1                      | <0.1    | <0.1    | >200       | 50         |
| CAP210.2.00.E8                                         | C     | 2    | >1000                 | <0.03 (>140x)   |                        | 4.2                       | 1.6     | 2.0     | >200       | 59         |
| Q842.d12                                               | A     | 2    | >1000                 | <0.03 (>7x)     |                        | 0.2                       | <0.1    | <0.1    | 0.21       | 0.09       |
| Q259.d2.17                                             | A     | 2    | >1000                 | <0.03 (>33x)    |                        | 1.0                       | 0.4     | 0.2     | 3.7        | 0.03       |
| 3718.v3.c11                                            | A     | 2    | >1000                 | <0.03 (>27x)    |                        | 0.8                       | <0.1    | <0.1    | >200       | >330       |
| 0330.v4.c3                                             | A     | 2    | >1000                 | <0.03 (>7x)     |                        | 0.2                       | <0.1    | <0.1    | 0.62       | 0.2        |
| 3415.v1.c1                                             | A     | 2    | >1000                 | <0.03 (>67x)    |                        | 2.0                       | 1.0     | 1.2     | 4.6        | 0.9        |
| <b>Geometric Mean IC<sub>50</sub> (nM)</b>             |       |      |                       | 0.038           |                        |                           |         |         |            |            |
| <b>Arithmetic Mean IC<sub>50</sub> (nM)</b>            |       |      |                       | 0.049           |                        |                           |         |         |            |            |
| <b>Mean Fold Improvement Over Mixture (Geometric)</b>  |       |      |                       | 68              |                        |                           |         |         |            |            |
| <b>Mean Fold Improvement Over Mixture (Arithmetic)</b> |       |      |                       | 121             |                        |                           |         |         |            |            |
